# Supplementary material for: Digitally enabled acute care for atrial fibrillation: conception, feasibility and early outcomes of an AF virtual ward
Source: PubMed Central journal article supplement (PMC10314691; doi:10.1136/openhrt-2023-002272), 2023-06-29
Supplement: openhrt-2023-002272supp001.pdf [file openhrt-2023-002272supp001.pdf]

| <b>Table 1</b> Admission criteria to the virtual ward.                                                                               |                                                                                            |
|--------------------------------------------------------------------------------------------------------------------------------------|--------------------------------------------------------------------------------------------|
| <b>Inclusion criteria</b>                                                                                                            | <b>Exclusion criteria</b>                                                                  |
| Patients above the age of 18 presenting with AF or AFL as the main indication for admission.                                         | Patients who are adequately rate controlled with a HR <100 bpm on referral.                |
| No underlying acute factors causing AF (i.e. Heart failure/thyroid dysfunction/Sepsis).                                              | Patients who revert to sinus rhythm before on-boarding to the virtual ward.                |
| AF/AFL duration > 48 hours at the time of referral or unknown                                                                        | Patients on the waiting list for an in-patient procedure that prevents hospital discharge. |
| Haemodynamically stable with no other clinical indications for hospital admission. e.g. acute coronary syndrome, pulmonary embolism. |                                                                                            |
| Heart rate less than or equal 140 bpm.                                                                                               |                                                                                            |
| Blood pressure more than or equal 90/55 and less than 180/110mmHg.                                                                   |                                                                                            |

|                                                                                                                                                                                   |  |
|-----------------------------------------------------------------------------------------------------------------------------------------------------------------------------------|--|
| Completion of baseline observations, Thyroid Function Test (result may be pending) and as clinically relevant CRP, D-Dimer, Troponin with results being clinically insignificant. |  |
| Patient willing and agreed to engage with virtual monitoring.                                                                                                                     |  |
| Patient willing and agreed to return all loaned equipment.                                                                                                                        |  |
| Able to manage technology or receive support from a relative.                                                                                                                     |  |
| Able to read and speak English or receive support from a relative.                                                                                                                |  |
| Patient remains in the United Kingdom.                                                                                                                                            |  |
| Patient must have an active telephone number.                                                                                                                                     |  |

AF Atrial Fibrillation; AFL Atrial flutter; CRP C-Reactive protein

| <b>Table 2.</b> Summary of feedback from patients on discharge from the virtual ward, positive and negative with examples. |                                                                                                                                                                                                                                                          |
|----------------------------------------------------------------------------------------------------------------------------|----------------------------------------------------------------------------------------------------------------------------------------------------------------------------------------------------------------------------------------------------------|
| <b>Positive</b>                                                                                                            |                                                                                                                                                                                                                                                          |
| Experience with a virtual ward                                                                                             | It gave me the feeling of confidence that someone was monitoring me whilst my condition stabilised. There were two or three times where I felt that would have attended ED or rang emergency services if it wasn't for the support that I have received. |
|                                                                                                                            | Must say though, that this is much better than being in and taking up a bed and your time, far better.                                                                                                                                                   |
|                                                                                                                            | It made me feel I was still being cared for although I was not in hospital. I was very concerned when I was admitted, and this made my whole experience very good.                                                                                       |
| Patient engagement and education                                                                                           | It gives us a chance to be more involved in treatment and understanding the problem and allowing us some control which I often think is missing.                                                                                                         |
|                                                                                                                            | It provided good support and gave me information about my condition.                                                                                                                                                                                     |
| Technology easy to use                                                                                                     | I found it very easy to submit the readings.                                                                                                                                                                                                             |
|                                                                                                                            | I am technophobe and I found it easy.                                                                                                                                                                                                                    |

|                                    |                                                                                                                                         |
|------------------------------------|-----------------------------------------------------------------------------------------------------------------------------------------|
|                                    | Equipment was simple to use, and the feedback was helpful and reassuring.                                                               |
| Arranging re-admission to hospital | We and the paramedic who had to visit were really impressed with the service.                                                           |
| <b>Negative</b>                    |                                                                                                                                         |
| Difficulties with the technology   | It was a bit confusing at first but once you are comfortable and familiar with the technology it gives you confidence in your recovery. |
|                                    | Explanation was very good but possibly a bit rushed.                                                                                    |
|                                    | I feel like elderly patients might get confused with the technology.                                                                    |
|                                    | I found it difficult at first but was able to get support from staff once I got home.                                                   |
| Discharge from inpatient services  | Felt very stressed waiting for 23 hours for the hospital paperwork to be completed so that I can go home.                               |
|                                    | The hospital ward was disorienting, and I had no idea where I was.                                                                      |
| Communication                      | Make sure text messages sent are clear in what they mean.                                                                               |
|                                    | Make the contact number clearer in case you need urgent help, messages seem to take some time.                                          |

|                             |                                                                                                                                             |
|-----------------------------|---------------------------------------------------------------------------------------------------------------------------------------------|
| Suggestions for improvement | Do several tests on the equipment and familiarise myself with the equipment before being discharged.                                        |
|                             | The timings for readings were restrictive, it would be better if they were first thing in the morning, after lunch and bedtime if possible. |
